# Supplementary material
Source: publisher figshare collection journal article supplement (https://sage.figshare.com/ndownloader/files/13836089)

**Table 1 Supplement: The Percentage of Women in the Office of County Clerk, By State**

| <b>State</b>   | <b>Percentage</b> |
|----------------|-------------------|
| Arizona        | 100%              |
| Texas          | 92.06             |
| Arkansas       | 90.67             |
| Kansas         | 90.2              |
| Michigan       | 87.95             |
| Colorado       | 84.37             |
| Oregon         | 78.79             |
| Tennessee      | 74.74             |
| West Virginia  | 65.45             |
| Illinois       | 65                |
| New Jersey     | 57.14             |
| New York       | 54.39             |
| Overall Sample | 81.50             |

**Figure 1 Supplement: Predicted Probability of Having a Female Clerk by Population**

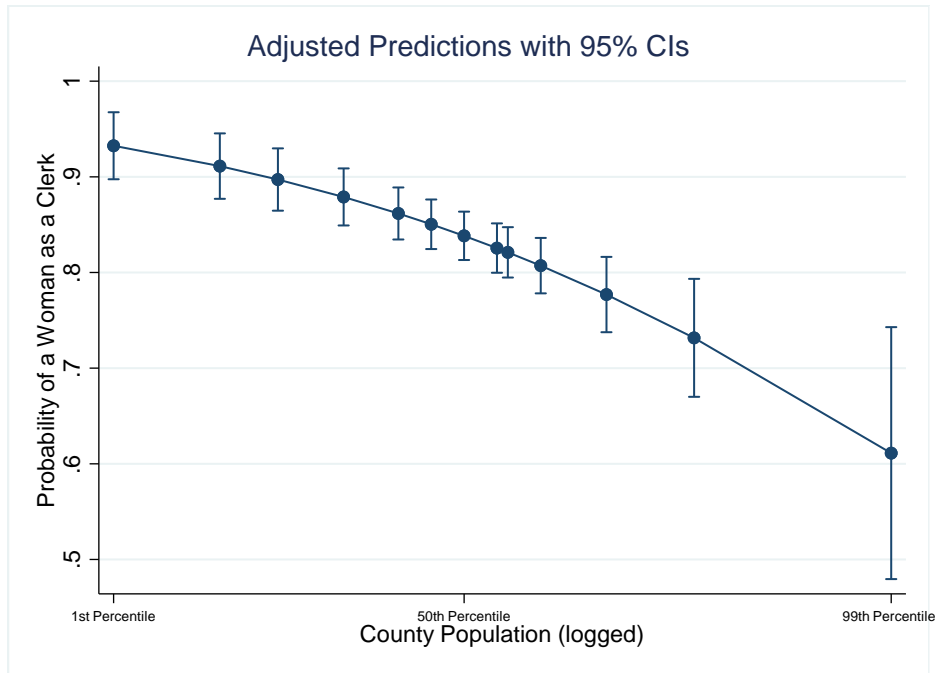

**Figure 2 Supplement: Predicted Probability of Having a Female Clerk by Two Party Support for Obama**

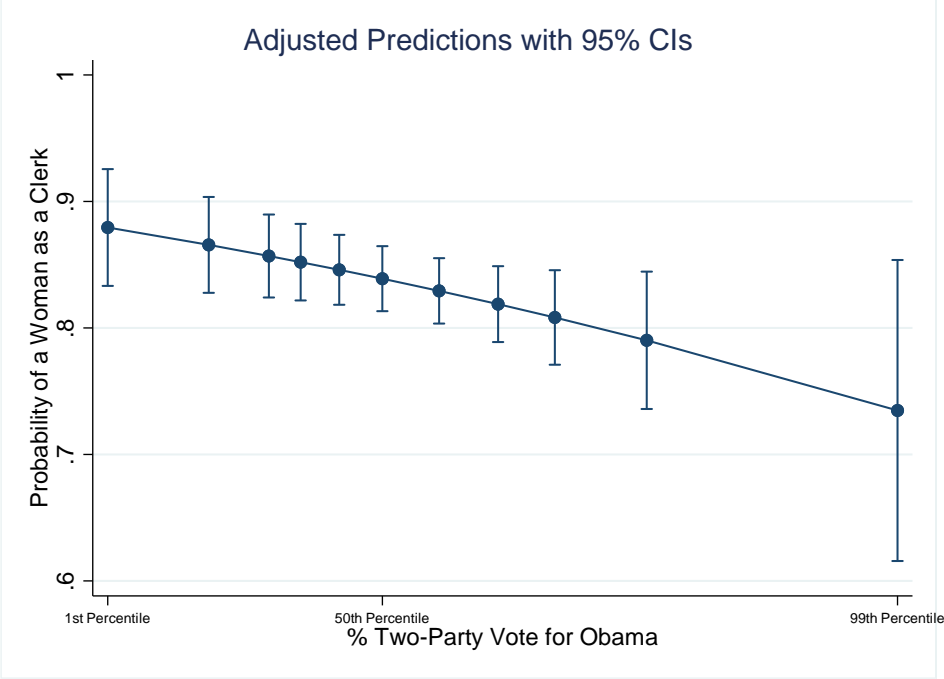

**Figure 3 Supplement: Predicted Probability of Having a Female Clerk by Women in Other County Elected Offices**

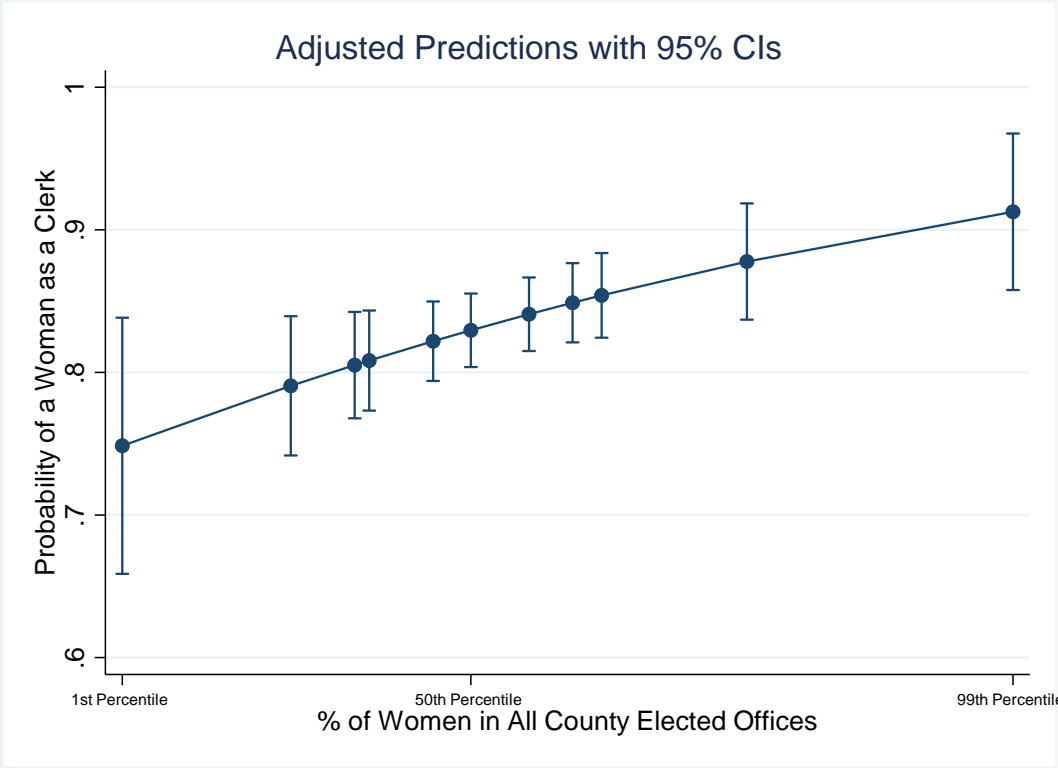

Supplement: Supplementary file 1 [file 13836089]
